# Supplementary material for: Investigation of Indigenous Arbuscular Mycorrhizal Performance Using a Lotus japonicus Mycorrhizal Mutant
Source: MDPI journal article supplement (doi:10.3390/plants9050658), 2020-05-22
Supplement: s1 [file s1]

# Supplementary Material

| soil | type           | vegetation | introduction of different soil | Truog (P <sub>2</sub> O <sub>5</sub> mg/soil 100g) | colonization (%) |
|------|----------------|------------|--------------------------------|----------------------------------------------------|------------------|
| 1    | cultivated     | oat        | yes                            | 38.9                                               | 2.2              |
| 2    | cultivated     | corn       | yes                            | 32.1                                               | 2.7              |
| 4    | non-cultivated | yes        | yes                            | 3.5                                                | 26.0             |
| 5    | cultivated     | n.d.       | yes                            | 17.5                                               | 20.6             |
| 6    | non-cultivated | no         | no                             | 7.5                                                | 3.4              |
| 7    | non-cultivated | no         | no                             | 9.4                                                | 12.1             |
| 8    | non-cultivated | no         | no                             | 5.3                                                | 4.1              |
| 9    | non-cultivated | no         | no                             | 4.7                                                | 4.5              |
| 10   | non-cultivated | yes        | no                             | 5.6                                                | 28.7             |
| 11   | non-cultivated | yes        | yes                            | 4.3                                                | 13.8             |
| 12   | non-cultivated | no         | yes                            | 2.1                                                | 1.1              |
| 13   | non-cultivated | yes        | no                             | 4.6                                                | 5.2              |
| 14   | non-cultivated | yes        | no                             | 3.9                                                | 0.6              |
| 15   | non-cultivated | yes        | no                             | 4.9                                                | 11.8             |
| 16   | non-cultivated | yes        | yes                            | 4.2                                                | 5.6              |
| 17   | non-cultivated | yes        | yes                            | 1.4                                                | 22.0             |
| 19   | non-cultivated | no         | yes                            | 5.4                                                | 13.8             |
| 20   | cultivated     | n.d.       | no                             | 36.7                                               | 23.0             |
| 21   | non-cultivated | no         | yes                            | 20.7                                               | 10.6             |
| 22   | cultivated     | flower     | yes                            | 1.7                                                | 8.7              |
| 25   | non-cultivated | no         | no                             | 2.2                                                | 5.7              |
| 26   | non-cultivated | yes        | no                             | 4.2                                                | 5.1              |
| 27   | non-cultivated | no         | no                             | 1.0                                                | 0.9              |
| 28   | non-cultivated | yes        | no                             | 3.9                                                | 7.0              |

**Table S1**  
The management history of 24 soils used in this study

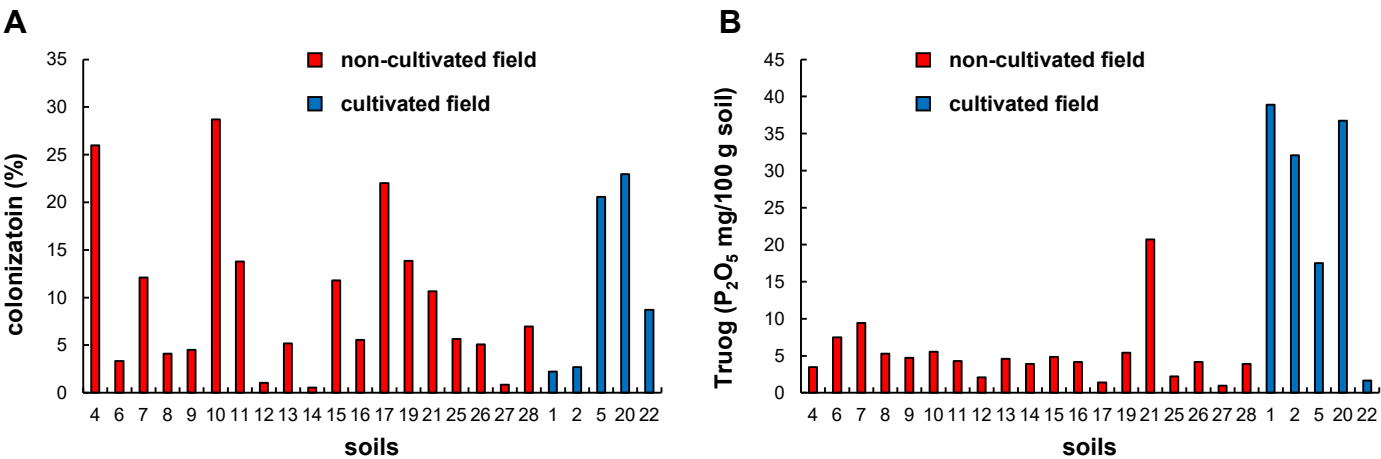

**Figure S1**  
The colonization potential of indigenous arbuscular mycorrhizal fungi and phosphorus content in the soils used in this study. (A) Colonization potential of indigenous arbuscular mycorrhizal fungi (AMF) of 24 soils. *Lotus japonicus* wild-type seedlings were grown for 20 days in pot culture. (B) Phosphate levels of 24 soils determined by Truog method. Red-bars and blue-bars indicate the soils collected from non-cultivated fields and cultivated fields, respectively.
